# Supplementary material
Source: PubMed Central journal article supplement (PMC6328032)
Supplement: jciinsight-3-99860-s136.pdf [file jciinsight-3-99860-s136.pdf]

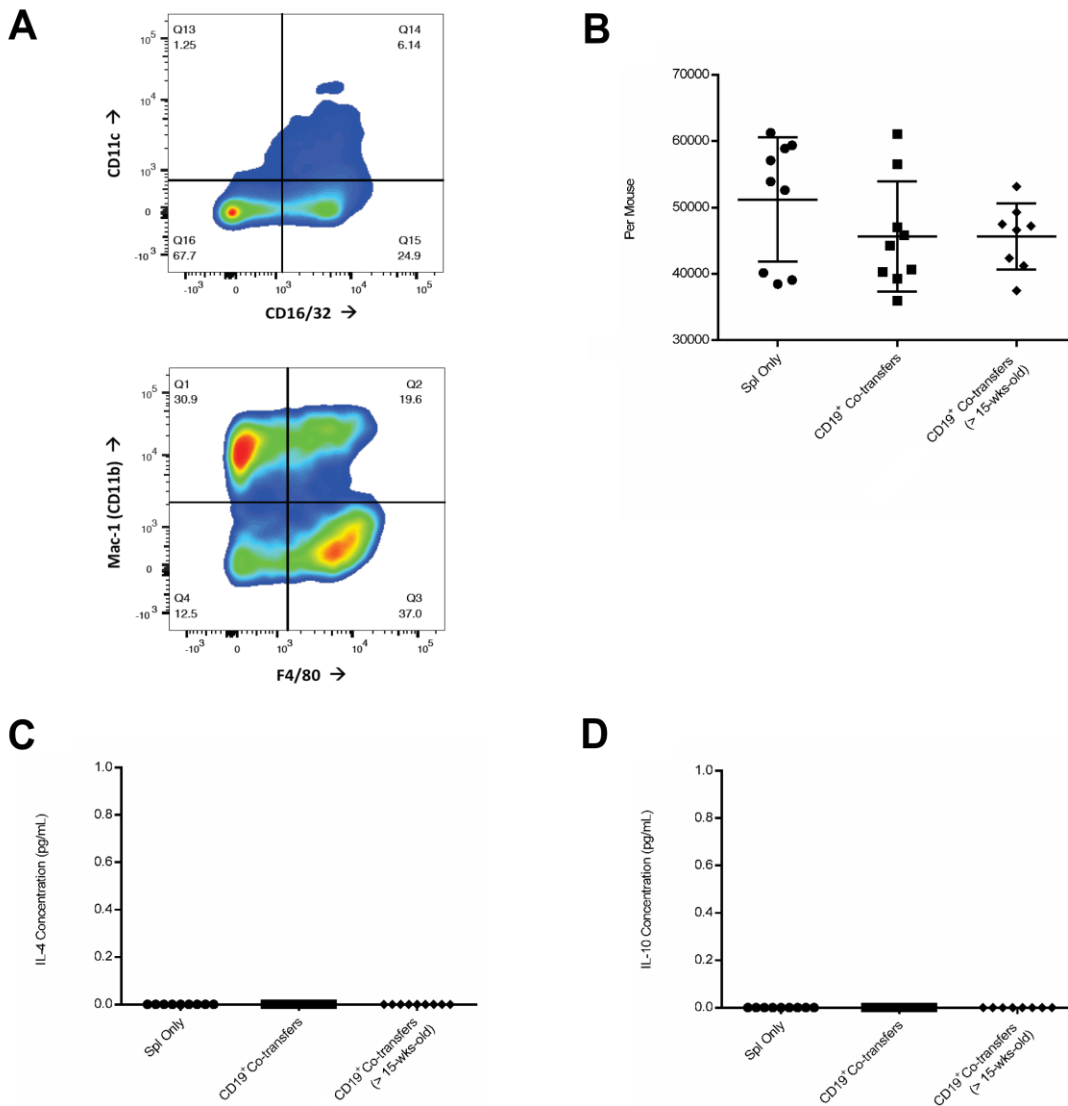

**Supplementary Figure 1. Adoptive co-transfer of CD19<sup>+</sup> cells purified from 6-week-old NOD donors does not increase peripheral M1 macrophage populations nor increase circulating levels of anti-inflammatory cytokines.**

Serum was collected from NOD.*scid* recipients receiving either splenocytes from a diabetic NOD donor, diabetic splenocytes and (A) Representative staining for macrophages with cells initially gated on CD11c<sup>-</sup>CD16/32<sup>+</sup>, and then sub-gated on the Mac-1<sup>+</sup>F4/80<sup>+</sup> group (upper right quadrant) of M1 macrophages. (B) CD11c<sup>-</sup>CD16/32<sup>+</sup>Mac-1<sup>+</sup>F4/80<sup>+</sup> M1 macrophages were analyzed in 26 NOD.*scid* recipients, and total M1 macrophages were calculated using the percentage subgroup populations with non-significant p-values calculated using a non-parametric t-test with Welch's correlation. CD19<sup>+</sup> cells from 6-wk-old NOD donors, or splenocytes from a diabetic NOD donor with CD19<sup>+</sup> cells from >15-wk-old NOD donors. The presence of (C) IL-4. (D) IL-10 was analyzed by ELISA.
